# Supplementary material for: Study on Structural Evolution, Thermochemistry and Electron Affinity of Neutral, Mono- and Di-Anionic Zirconium-Doped Silicon Clusters ZrSin0/-/2- (n = 6–16)
Source: MDPI journal article supplement (doi:10.3390/ijms20122933), 2019-06-15
Supplement: s1 [file s1]

# Study on Structural Evolution, Thermochemistry and Electron Affinity of Neutral, Mono- and Di-Anionic Zirconium-Doped Silicon Clusters $\text{ZrSi}_n^{0/-/2-}$ ( $n = 6-16$ )

Caixia Dong <sup>1,2</sup>, Limin Han <sup>1</sup>, Jucai Yang <sup>1,3,\*</sup> and Lin Cheng <sup>1,\*</sup>

<sup>1</sup> Inner Mongolia Key Laboratory of Theoretical and Computational Chemistry Simulation, School of Chemical Engineering, Inner Mongolia University of Technology, Hohhot 010051, China; Dongcx201011@163.com (C.D.); hanlimin@imut.edu.cn (L.H.)

<sup>2</sup> School of Mining and Technology, Inner Mongolia University of Technology, Hohhot 010051, China

<sup>3</sup> School of Energy and Power Engineering, Inner Mongolia University of Technology, Hohhot 010051, China

\* Correspondence: yangjc@imut.edu.cn (J.Y.); lcheng1983@aliyun.com (L.C.); Tel.: +86-0471-657-6145 (J.Y.)

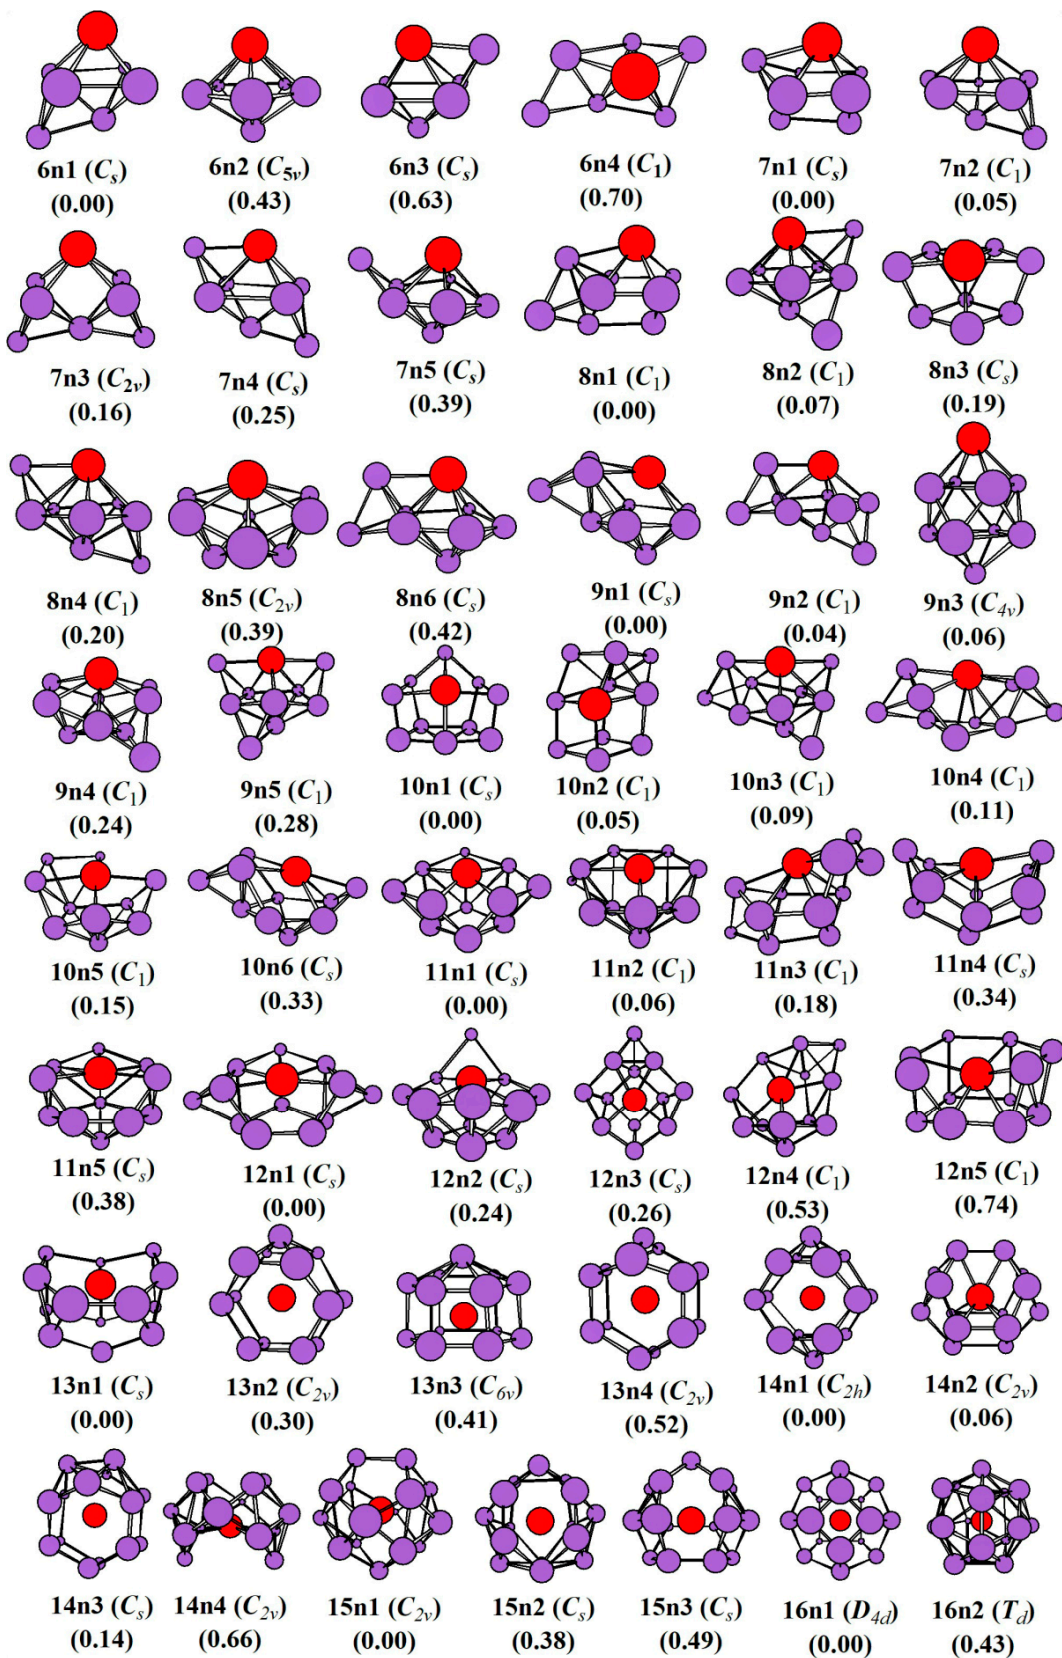

**Figure S1.** Low-lying isomers of neutral  $ZrSi_n$  ( $n = 6-16$ ) clusters, point group and relative energy (in eV).

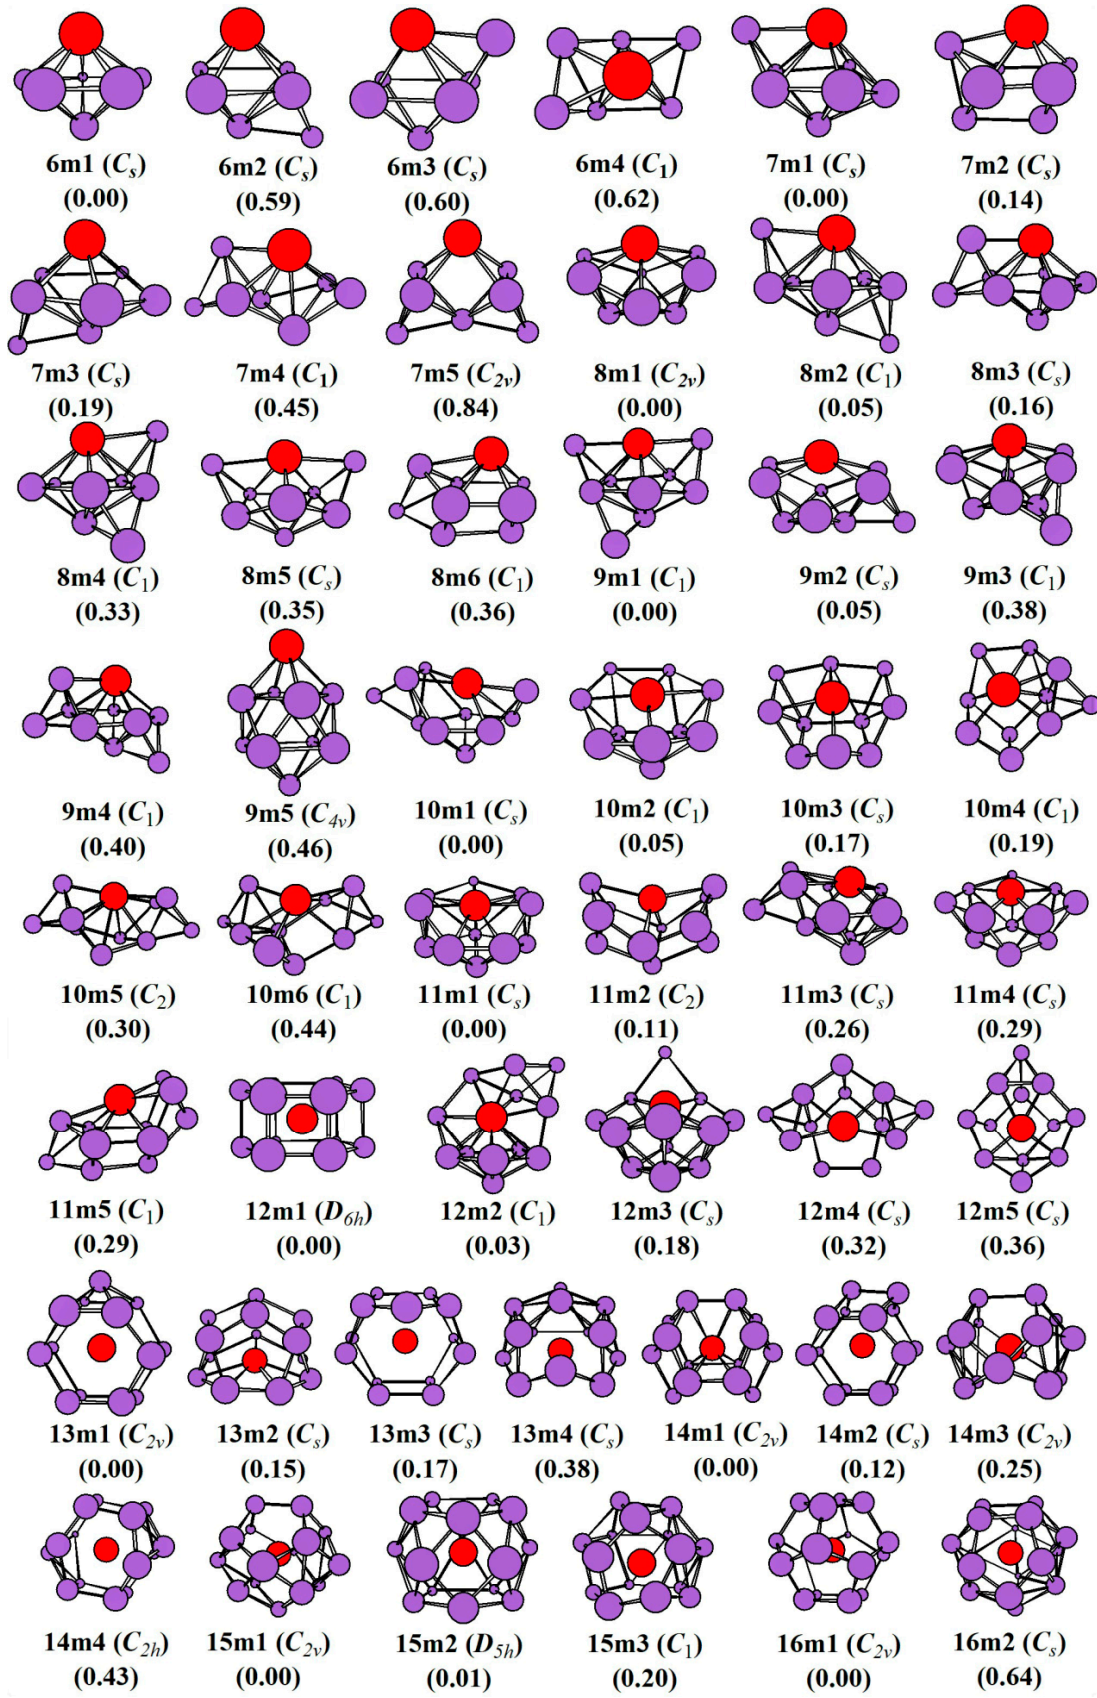

**Figure S2.** Low-lying isomers of mono-anionic  $ZrSi_n$  ( $n = 6-16$ ) clusters, point group and relative energy (in eV).



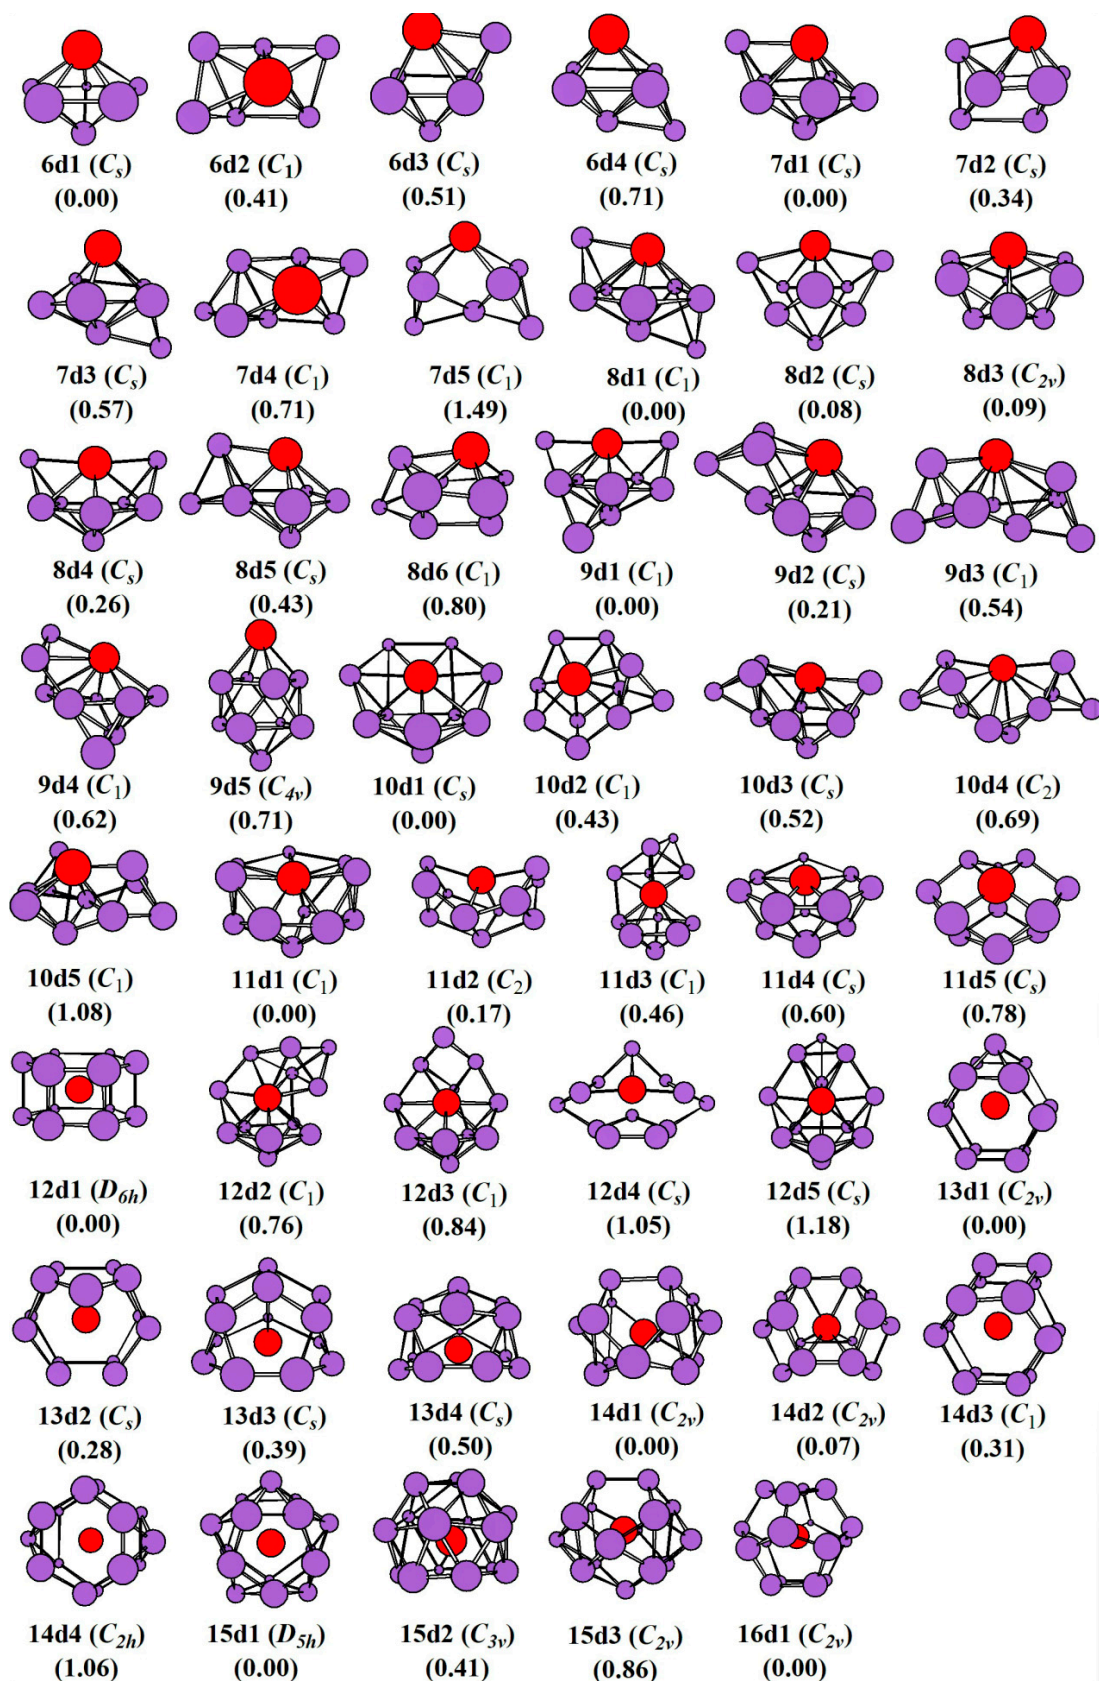

**Figure S3.** Low-lying isomers of di-anionic  $ZrSi_n^{2-}$  ( $n = 6-16$ ) clusters, point group and relative energy (in eV).

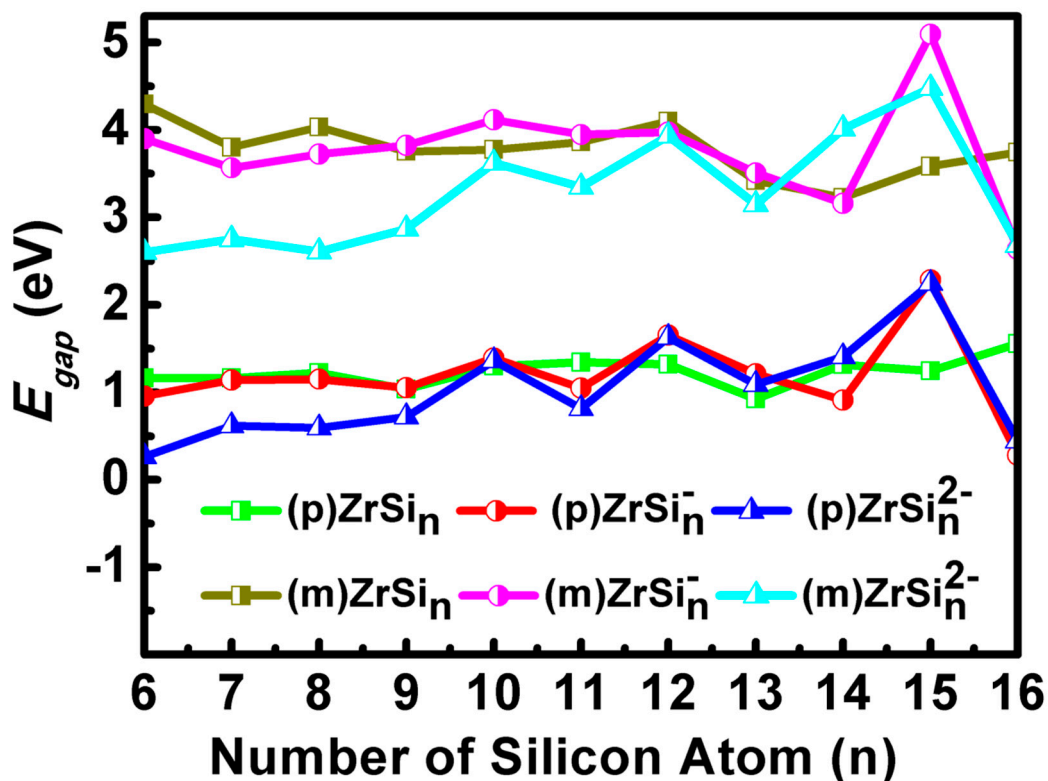

**Figure S4.** The HOMO-LUMO energy gap ( $E_{gap}$ ) of  $\text{ZrSi}_n^{0/-/2-}$  ( $n = 6-16$ ) clusters. (m) stands for mPW2PLYP calculations and (p) stands for PBE/PBE calculations.

**Table S1.** Conformational population (%) for low-lying geometries of  $\text{ZrSi}_n^{0/-/2-}$  species ( $n = 6-16$ ) clusters.

| Species | Conformational population |        |        |        |        |        |
|---------|---------------------------|--------|--------|--------|--------|--------|
|         | 1                         | 2      | 3      | 4      | 5      | 6      |
| 6n      | 46.83%                    | 22.65% | 16.16% | 14.36% |        |        |
| 7n      | 25.94%                    | 23.84% | 19.80% | 17.00% | 13.42% |        |
| 8n      | 23.06%                    | 20.49% | 16.73% | 16.45% | 11.93% | 11.34% |
| 9n      | 24.22%                    | 22.64% | 21.89% | 16.15% | 15.10% |        |
| 10n     | 20.17%                    | 18.54% | 17.33% | 16.75% | 15.66% | 11.55% |
| 11n     | 26.80%                    | 24.22% | 19.78% | 15.09% | 14.11% |        |
| 12n     | 33.26%                    | 22.18% | 21.44% | 13.59% | 9.53%  |        |
| 13n     | 39.71%                    | 23.92% | 19.87% | 16.50% |        |        |
| 14n     | 33.10%                    | 29.91% | 26.13% | 10.86% |        |        |
| 15n     | 50.93%                    | 26.81% | 22.26% |        |        |        |
| 16n     | 67.40%                    | 32.60% |        |        |        |        |
| 6m      | 48.00%                    | 17.72% | 17.43% | 16.85% |        |        |
| 7m      | 31.01%                    | 24.48% | 22.50% | 14.50% | 7.51%  |        |
| 8m      | 22.97%                    | 21.11% | 17.53% | 13.16% | 12.72% | 12.51% |
| 9m      | 29.29%                    | 26.92% | 15.42% | 14.91% | 13.47% |        |
| 10m     | 22.36%                    | 20.55% | 16.78% | 16.22% | 13.47% | 10.63% |
| 11m     | 27.02%                    | 22.44% | 17.42% | 16.56% | 16.56% |        |
| 12m     | 26.21%                    | 24.91% | 19.34% | 15.27% | 14.27% |        |
| 13m     | 32.75%                    | 25.42% | 24.58% | 17.24% |        |        |
| 14m     | 33.83%                    | 27.62% | 22.18% | 16.37% |        |        |
| 15m     | 37.08%                    | 36.46% | 26.45% |        |        |        |
| 16m     | 74.67%                    | 25.33% |        |        |        |        |

|     |         |        |        |        |        |       |
|-----|---------|--------|--------|--------|--------|-------|
| 6d  | 44.96%  | 22.49% | 19.00% | 13.55% |        |       |
| 7d  | 42.97%  | 24.20% | 16.41% | 12.95% | 3.47%  |       |
| 8d  | 24.27%  | 21.20% | 20.85% | 15.65% | 11.74% | 6.29% |
| 9d  | 36.29%  | 25.45% | 14.58% | 12.74% | 10.94% |       |
| 10d | 42.15%  | 20.39% | 17.51% | 13.14% | 6.80%  |       |
| 11d | 35.20%  | 26.41% | 16.18% | 12.78% | 9.43%  |       |
| 12d | 54.79%  | 15.18% | 13.26% | 9.30%  | 7.47%  |       |
| 13d | 38.90%  | 24.24% | 20.13% | 16.72% |        |       |
| 14d | 37.77%  | 33.56% | 22.37% | 6.30%  |        |       |
| 15d | 57.66%  | 28.85% | 13.49% |        |        |       |
| 16d | 100.00% |        |        |        |        |       |

---
